# Supplementary material
Source: PubMed Central journal article supplement (PMC6813596)
Supplement: jamaoncol-6-e194107-s001.pdf [file jamaoncol-6-e194107-s001.pdf]

## Supplementary Online Content

Yang JJ, Yu D, Xiang Y-B, et al. Association of dietary fiber and yogurt consumption with lung cancer risk: a pooled analysis. *JAMA Oncol*. Published online October 24, 2019. doi:10.1001/jamaoncol.2019.4107

**eAppendix.** Missing Data Imputation for Covariates

**eTable 1.** Characteristics of the Participating Cohort Studies

**eTable 2.** Baseline Characteristics of Lung Cancer Cases

**eTable 3.** Hazard Ratios (95% CIs) of Lung Cancer by Dietary Fiber Intake and Yogurt Consumption in Sequential Adjustment Models

**eTable 4.** Hazard Ratios (95% CIs) of Lung Cancer by Dietary Fiber Intake and Yogurt Consumption: Using the Common Cut-Points of Fiber and Yogurt Intakes Across Cohorts

**eTable 5.** Hazard ratios (95% CIs) of Lung Cancer by Dietary Fiber Intake and Yogurt Consumption: Using the Cohort- and Sex-Specific Cut-Points of Fiber and Yogurt Intakes

**eTable 6.** Hazard ratios (95% CIs) of Lung Cancer by Dietary Fiber Intake and Yogurt Consumption: Sensitivity Analyses Among the Total Study Population

**eFigure 1.** Lung Cancer Risk Associated With Dietary Fiber Intake in Each Participating Cohort

**eFigure 2.** Lung Cancer Risk Associated With Yogurt Consumption in Each Participating Cohort

**eFigure 3.** Dose-Response Relationship of Dietary Fiber Intake and Yogurt Consumption With Lung Cancer Risk

This supplementary material has been provided by the authors to give readers additional information about their work.

## **eAppendix. Missing Data Imputation for Covariates**

Among selected covariates, we had no missing data on age, gender, smoking status, and total energy intake. The missing proportions of other covariates were all <3% in the IWHS, SCCS, SMHS, and SWHS, and mostly <3%, but some were 3–10%, in the AARP, HPFS, NHS, PLCO, VITAL, and EPIC. Missing covariates were imputed separately in each cohort considering different study protocols and characteristics of participants across cohorts. If the proportion of missing covariates was <3%, missing was replaced by sex-specific median (for continuous variables) and mode (for categorical variables) values of the non-missing data. If missing proportion was  $\geq 3\%$  (including education level, body mass index, physical activity, or smoking duration/intensity in the above-mentioned cohorts), we conducted imputation by chained equations method using the SAS PROC MI procedure, fully conditional specification (FCS) statement. Only participants with complete information on outcome variables, age, gender, smoking status, and total energy intake were included in building of the imputation models. Variables in the imputation models included lung cancer status, total follow-up time, intakes of total energy and macronutrients, and all other referenced covariates included in the final Cox model. Linear and logistic regression models were fitted for continuous and categorical variables, respectively. After imputation, one single complete dataset was created within each cohort and used to estimate the cohort-specific results.

\*Abbreviations: AARP, National Health Institute-AARP Diet and Health Study; HPFS, Health Professionals Follow-up Study; NHS, Nurses' Health Study; IWHS, Iowa Women's Health Study; PLCO, Prostate, Lung, Colorectal and Ovarian Cancer Screening Trial; SCCS, Southern Community Cohort Study; VITAL, VITamins And Lifestyle Study; EPIC, European Prospective Investigation into Cancer & Nutrition; SMHS, Shanghai Men's Health Study; SWHS, Shanghai Women's Health Study

**eTable 1. Characteristics of the Participating Cohort Studies**

| Cohort | Country | Study Enrollment | Sex   | No. of Participants (%) <sup>a</sup> | Follow-up Years <sup>b</sup> | Age at Baseline <sup>c</sup> | No. of Cases (%) | Years to Diagnosis <sup>d</sup> | % of Ever Smokers | Total Fiber Intake (g/d) <sup>e</sup> | % of Yogurt Consumed | Yogurt Intake (g/d) <sup>e,f</sup> |
|--------|---------|------------------|-------|--------------------------------------|------------------------------|------------------------------|------------------|---------------------------------|-------------------|---------------------------------------|----------------------|------------------------------------|
| AARP   | USA     | 1995-1997        | Men   | 276,118 (19.1)                       | 8.5                          | 50-71                        | 5,051 (26.8)     | 4.4                             | 73.9              | 18.3 (14.5-22.9)                      | 45.3                 | 5.1 (1.8-20.2)                     |
|        |         |                  | Women | 189,193 (13.1)                       | 8.6                          | 50-71                        | 3,013 (16.0)     | 4.6                             | 52.7              | 16.1 (12.8-20.0)                      | 67.6                 | 12.3 (3.3-41.9)                    |
| HPFS   | USA     | 1986-1987        | Men   | 45,320 (3.1)                         | 20.9                         | 32-79                        | 930 (4.9)        | 11.1                            | 56.3              | 19.2 (15.5-23.4)                      | 36.5                 | 26.7 (17.1-61.1)                   |
| NHS    | USA     | 1984-1984        | Women | 75,937 (5.3)                         | 24.4                         | 37-65                        | 1,907 (10.1)     | 14.3                            | 56.1              | 16.2 (13.5-19.6)                      | 42.3                 | 27.7 (16.2-63.5)                   |
| IWHS   | USA     | 1986-1986        | Women | 33,574 (2.3)                         | 19.7                         | 52-71                        | 955 (5.1)        | 11.5                            | 34.0              | 18.4 (15.3-22.1)                      | 23.3                 | 23.2 (16.5-46.2)                   |
| PLCO   | USA     | 1993-2004        | Men   | 50,659 (3.5)                         | 7.5                          | 54-83                        | 864 (4.6)        | 4.5                             | 70.3              | 20.7 (16.5-25.6)                      | 56.3                 | 5.1 (1.9-17.5)                     |
|        |         |                  | Women | 52,627 (3.6)                         | 7.8                          | 53-82                        | 609 (3.2)        | 4.6                             | 42.8              | 17.7 (14.3-21.7)                      | 76.2                 | 11.2 (3.3-40.5)                    |
| SCCS   | USA     | 2002-2009        | Men   | 27,464 (1.9)                         | 4.3                          | 40-80                        | 325 (1.7)        | 2.5                             | 80.4              | 20.8 (16.5-25.8)                      | 47.5                 | 2.1 (1.5-13.4)                     |
|        |         |                  | Women | 40,489 (2.8)                         | 4.4                          | 40-80                        | 291 (1.5)        | 2.5                             | 54.9              | 17.0 (13.6-21.3)                      | 62.7                 | 6.0 (1.8-24.2)                     |
| VITAL  | USA     | 2000-2002        | Men   | 31,792 (2.2)                         | 8.0                          | 50-76                        | 468 (2.5)        | 3.8                             | 66.7              | 20.3 (16.6-24.8)                      | 38.1                 | 25.1 (10.5-70.7)                   |
|        |         |                  | Women | 33,898 (2.3)                         | 7.9                          | 50-76                        | 388 (2.1)        | 4.3                             | 43.9              | 14.5 (11.6-18.0)                      | 61.2                 | 33.6 (13.4-81.5)                   |
| EPIC   | Europe  | 1991-2001        | Men   | 136,607 (9.4)                        | 9.8                          | 19-97                        | 1,287 (6.8)      | 5.5                             | 66.4              | 23.2 (19.4-27.5)                      | 77.1                 | 39.2 (11.0-103.8)                  |
|        |         |                  | Women | 320,066 (22.1)                       | 9.6                          | 19-98                        | 1,191 (6.3)      | 5.9                             | 43.0              | 21.1 (17.9-24.8)                      | 81.4                 | 52.6 (20.8-109.2)                  |
| SMHS   | China   | 2001-2006        | Men   | 60,028 (4.2)                         | 8.3                          | 40-75                        | 776 (4.1)        | 4.7                             | 69.6              | 10.8 (9.0-13.0)                       | -                    | -                                  |
| SWHS   | China   | 1996-2000        | Women | 72,078 (5.0)                         | 14.1                         | 40-70                        | 767 (4.1)        | 8.7                             | 2.7               | 10.3 (8.5-12.5)                       | -                    | -                                  |
|        |         |                  |       | 1,445,850 (100)                      | 8.6                          | 19-98                        | 18,822 (100)     | 5.4                             | 54.9              | 18.4 (14.1-23.1)                      | 62.2                 | 23.3 (5.7-73.4)                    |

Abbreviations: AARP, National Health Institute-AARP Diet and Health Study; HPFS, Health Professionals Follow-up Study; NHS, Nurses' Health Study; IWHS, Iowa Women's Health Study; PLCO, Prostate, Lung, Colorectal and Ovarian Cancer Screening Trial; SCCS, Southern Community Cohort Study; VITAL, VITamins And Lifestyle Study; EPIC, European Prospective Investigation into Cancer & Nutrition; SMHS, Shanghai Men's Health Study; SWHS, Shanghai Women's Health Study

- a. Including only participants who were eligible for the current pooled analysis
- b. Median years of the time interval from two years after study entry to the date of the last follow-up (date of diagnosis of any cancer, death, end of follow-up, or follow-up loss, whichever came first)
- c. Age ranges at baseline (minimum to maximum)
- d. Time-to-lung cancer defined by median years of the time interval from two years after study entry to the date of diagnosis among lung cancer cases
- e. Energy-adjusted median intake (interquartile range) by the residual method
- f. Estimated among yogurt consumers; participants from the SMHS/SWHS and those having invalid data on yogurt consumption were not included in the analysis

**eTable 2. Baseline Characteristics of Lung Cancer Cases**

|                                                    | Lung Cancer Cases, N=18,822 |                |
|----------------------------------------------------|-----------------------------|----------------|
|                                                    | Men, n=9,701                | Women, n=9,121 |
| <b>Age, years</b>                                  | 62.3                        | 59.4           |
| <b>Race/ethnicity, %</b>                           |                             |                |
| Whites                                             | 86.7                        | 86.9           |
| Blacks                                             | 4.5                         | 4.2            |
| Asians <sup>a</sup>                                | 8.9                         | 8.9            |
| <b>University degree or above, %</b>               | 32.9                        | 18.3           |
| <b>Body mass index, kg/m<sup>2</sup></b>           | 26.3                        | 25.4           |
| <b>Diabetes, %</b>                                 | 9.4                         | 5.1            |
| <b>Family history of lung cancer, %</b>            | 3.3                         | 2.9            |
| <b>Smoking status, %</b>                           |                             |                |
| Never smoker                                       | 5.8                         | 19.1           |
| Former smoker                                      | 49.2                        | 28.8           |
| Current smoker                                     | 45.0                        | 52.1           |
| <b>Pack-years among ever smokers <sup>b</sup></b>  | 48.0                        | 38.5           |
| <b>Alcohol intake, g/day</b>                       | 22.3                        | 8.7            |
| <b>Low-level physical activity <sup>c</sup>, %</b> | 30.9                        | 28.3           |
| <b>Menopause, %</b>                                | -                           | 88.9           |
| <b>Dietary intakes <sup>d</sup></b>                |                             |                |
| Energy, kcal/day                                   | 2,175                       | 1,693          |
| Total fiber, g/day                                 | 18.1                        | 16.0           |
| Yogurt, g/day                                      | 12.3                        | 23.9           |
| Saturated fat, g/day                               | 23.1                        | 19.7           |
| Polyunsaturated fat, g/day                         | 14.2                        | 11.6           |

Data are mean values for continuous variables or proportions (%) for categorical variables.

- a. For fiber intake, included were Asian participants in the US and Chinese cohorts; for yogurt consumption, only Asian participants in the US cohorts were included. No data were available on yogurt consumption in the SMHS and SWHS
- b. Calculated by the equation: (no. of cigarettes smoked per day x no. of years smoked)/20, among former and current smokers
- c. The lowest tertile of total physical activity measured by hours or metabolic equivalent hours
- d. Energy-adjusted mean intake per day using the residual method

**eTable 3. Hazard Ratios (95% CIs)<sup>a</sup> of Lung Cancer by Dietary Fiber Intake and Yogurt Consumption in Sequential Adjustment Models**

|                                | Total Fiber Intake <sup>b</sup> |                  |                  |                  |                  |         | Yogurt Consumption <sup>c</sup> |                  |                  |         |
|--------------------------------|---------------------------------|------------------|------------------|------------------|------------------|---------|---------------------------------|------------------|------------------|---------|
|                                | Q1                              | Q2               | Q3               | Q4               | Q5               | P trend | None                            | Low              | High             | P trend |
| <b>Total study populations</b> |                                 |                  |                  |                  |                  |         |                                 |                  |                  |         |
| No. Lung cancer cases          | 5,686                           | 4,603            | 3,440            | 2,809            | 2,284            |         | 9,897                           | 4,326            | 2,898            |         |
| Model 1 <sup>d</sup>           | 1 (ref.)                        | 0.72 (0.65-0.79) | 0.54 (0.49-0.60) | 0.44 (0.41-0.46) | 0.38 (0.34-0.41) | <0.001  | 1 (ref.)                        | 0.67 (0.60-0.75) | 0.54 (0.49-0.60) | <0.001  |
| Model 2 <sup>e</sup>           | 1 (ref.)                        | 0.76 (0.69-0.83) | 0.60 (0.53-0.66) | 0.50 (0.46-0.54) | 0.44 (0.39-0.49) | <0.001  | 1 (ref.)                        | 0.73 (0.66-0.81) | 0.62 (0.58-0.67) | <0.001  |
| Model 3 <sup>f</sup>           | 1 (ref.)                        | 0.91 (0.85-0.97) | 0.79 (0.74-0.85) | 0.76 (0.71-0.80) | 0.72 (0.66-0.79) | <0.001  | 1 (ref.)                        | 0.83 (0.78-0.89) | 0.77 (0.71-0.82) | <0.001  |
| Model 4 <sup>g</sup>           | 1 (ref.)                        | 0.96 (0.90-1.01) | 0.87 (0.81-0.94) | 0.85 (0.80-0.90) | 0.83 (0.76-0.91) | <0.001  | 1 (ref.)                        | 0.85 (0.81-0.90) | 0.81 (0.76-0.87) | <0.001  |
| <b>Men</b>                     |                                 |                  |                  |                  |                  |         |                                 |                  |                  |         |
| No. Lung cancer cases          | 2,687                           | 2,288            | 1,898            | 1,540            | 1,288            |         | 5,621                           | 1,897            | 1,293            |         |
| Model 1 <sup>d</sup>           | 1 (ref.)                        | 0.75 (0.65-0.86) | 0.62 (0.52-0.74) | 0.44 (0.41-0.48) | 0.39 (0.32-0.46) | <0.001  | 1 (ref.)                        | 0.64 (0.55-0.75) | 0.50 (0.45-0.56) | <0.001  |
| Model 2 <sup>e</sup>           | 1 (ref.)                        | 0.79 (0.69-0.90) | 0.67 (0.57-0.79) | 0.51 (0.45-0.57) | 0.47 (0.38-0.59) | <0.001  | 1 (ref.)                        | 0.72 (0.64-0.81) | 0.59 (0.55-0.63) | <0.001  |
| Model 3 <sup>f</sup>           | 1 (ref.)                        | 0.91 (0.83-1.00) | 0.85 (0.74-0.97) | 0.73 (0.66-0.81) | 0.73 (0.60-0.87) | <0.001  | 1 (ref.)                        | 0.80 (0.76-0.84) | 0.72 (0.67-0.77) | <0.001  |
| Model 4 <sup>g</sup>           | 1 (ref.)                        | 0.97 (0.88-1.07) | 0.94 (0.83-1.08) | 0.83 (0.74-0.94) | 0.84 (0.71-1.00) | 0.001   | 1 (ref.)                        | 0.83 (0.79-0.88) | 0.76 (0.71-0.82) | <0.001  |
| <b>Women</b>                   |                                 |                  |                  |                  |                  |         |                                 |                  |                  |         |
| No. Lung cancer cases          | 2,999                           | 2,315            | 1,542            | 1,269            | 996              |         | 4,276                           | 2,429            | 1,605            |         |
| Model 1 <sup>d</sup>           | 1 (ref.)                        | 0.69 (0.59-0.80) | 0.48 (0.43-0.55) | 0.43 (0.39-0.47) | 0.38 (0.34-0.42) | <0.001  | 1 (ref.)                        | 0.69 (0.58-0.84) | 0.58 (0.49-0.68) | <0.001  |
| Model 2 <sup>e</sup>           | 1 (ref.)                        | 0.74 (0.64-0.85) | 0.54 (0.47-0.62) | 0.49 (0.43-0.55) | 0.42 (0.36-0.48) | <0.001  | 1 (ref.)                        | 0.75 (0.63-0.90) | 0.65 (0.57-0.74) | <0.001  |
| Model 3 <sup>f</sup>           | 1 (ref.)                        | 0.91 (0.83-0.99) | 0.76 (0.70-0.82) | 0.78 (0.72-0.83) | 0.74 (0.68-0.81) | <0.001  | 1 (ref.)                        | 0.87 (0.77-0.99) | 0.80 (0.72-0.89) | <0.001  |
| Model 4 <sup>g</sup>           | 1 (ref.)                        | 0.95 (0.88-1.03) | 0.83 (0.78-0.89) | 0.87 (0.80-0.94) | 0.84 (0.77-0.93) | <0.001  | 1 (ref.)                        | 0.89 (0.80-0.98) | 0.86 (0.78-0.95) | 0.002   |
| <b>Whites</b>                  |                                 |                  |                  |                  |                  |         |                                 |                  |                  |         |
| No. Lung cancer cases          | 4,193                           | 4,085            | 3,148            | 2,634            | 2,114            |         | 9,254                           | 3,973            | 2,797            |         |
| Model 1 <sup>d</sup>           | 1 (ref.)                        | 0.65 (0.61-0.69) | 0.49 (0.45-0.53) | 0.43 (0.41-0.46) | 0.36 (0.33-0.40) | <0.001  | 1 (ref.)                        | 0.66 (0.59-0.74) | 0.54 (0.49-0.60) | <0.001  |
| Model 2 <sup>e</sup>           | 1 (ref.)                        | 0.70 (0.66-0.75) | 0.54 (0.49-0.60) | 0.49 (0.44-0.53) | 0.43 (0.38-0.48) | <0.001  | 1 (ref.)                        | 0.72 (0.65-0.81) | 0.62 (0.57-0.67) | <0.001  |
| Model 3 <sup>f</sup>           | 1 (ref.)                        | 0.87 (0.83-0.92) | 0.76 (0.70-0.83) | 0.75 (0.70-0.80) | 0.72 (0.65-0.80) | <0.001  | 1 (ref.)                        | 0.83 (0.77-0.89) | 0.77 (0.72-0.82) | <0.001  |
| Model 4 <sup>g</sup>           | 1 (ref.)                        | 0.94 (0.88-0.99) | 0.85 (0.78-0.93) | 0.85 (0.79-0.91) | 0.83 (0.75-0.92) | <0.001  | 1 (ref.)                        | 0.85 (0.81-0.90) | 0.82 (0.77-0.88) | <0.001  |
| <b>Blacks</b>                  |                                 |                  |                  |                  |                  |         |                                 |                  |                  |         |
| No. Lung cancer cases          | 194                             | 191              | 183              | 123              | 116              |         | 484                             | 253              | 65               |         |
| Model 1 <sup>d</sup>           | 1 (ref.)                        | 0.82 (0.67-1.00) | 0.84 (0.68-1.03) | 0.59 (0.46-0.74) | 0.49 (0.38-0.62) | <0.001  | 1 (ref.)                        | 0.67 (0.57-0.78) | 0.61 (0.46-0.79) | 0.005   |
| Model 2 <sup>e</sup>           | 1 (ref.)                        | 0.84 (0.68-1.04) | 0.89 (0.71-1.11) | 0.65 (0.50-0.83) | 0.54 (0.41-0.71) | <0.001  | 1 (ref.)                        | 0.72 (0.58-0.89) | 0.68 (0.52-0.90) | 0.05    |
| Model 3 <sup>f</sup>           | 1 (ref.)                        | 0.95 (0.76-1.17) | 1.09 (0.87-1.37) | 0.82 (0.64-1.06) | 0.78 (0.60-1.03) | 0.07    | 1 (ref.)                        | 0.80 (0.68-0.94) | 0.81 (0.61-1.06) | 0.39    |
| Model 4 <sup>g</sup>           | 1 (ref.)                        | 0.99 (0.80-1.24) | 1.18 (0.94-1.48) | 0.90 (0.69-1.16) | 0.85 (0.65-1.12) | 0.26    | 1 (ref.)                        | 0.82 (0.69-0.96) | 0.83 (0.63-1.10) | 0.51    |
| <b>Asians</b>                  |                                 |                  |                  |                  |                  |         |                                 |                  |                  |         |
| No. Lung cancer cases          | 1,243                           | 291              | 73               | 28               | 21               |         | 60                              | 37               | 14               |         |
| Model 1 <sup>d</sup>           | 1 (ref.)                        | 1.00 (0.88-1.14) | 0.89 (0.69-1.15) | 0.60 (0.38-0.96) | 0.64 (0.36-1.12) | 0.04    | 1 (ref.)                        | 0.90 (0.56-1.43) | 0.67 (0.36-1.26) | 0.37    |
| Model 2 <sup>e</sup>           | 1 (ref.)                        | 1.06 (0.92-1.21) | 0.90 (0.68-1.20) | 0.58 (0.33-1.01) | 0.62 (0.34-1.14) | 0.27    | 1 (ref.)                        | 0.90 (0.55-1.47) | 0.59 (0.30-1.16) | 0.20    |
| Model 3 <sup>f</sup>           | 1 (ref.)                        | 1.10 (0.96-1.26) | 0.98 (0.76-1.27) | 0.68 (0.40-1.14) | 0.86 (0.46-1.60) | 0.94    | 1 (ref.)                        | 1.00 (0.57-1.76) | 0.71 (0.36-1.41) | 0.37    |
| Model 4 <sup>g</sup>           | 1 (ref.)                        | 1.10 (0.96-1.26) | 0.99 (0.77-1.29) | 0.70 (0.41-1.18) | 0.88 (0.47-1.65) | 0.99    | 1 (ref.)                        | 1.05 (0.63-1.75) | 0.73 (0.37-1.46) | 0.46    |
| <b>Adenocarcinoma</b>          |                                 |                  |                  |                  |                  |         |                                 |                  |                  |         |
| No. Lung cancer cases          | 2,035                           | 1,719            | 1,293            | 1,060            | 897              |         | 3,446                           | 1,718            | 1,149            |         |
| Model 1 <sup>d</sup>           | 1 (ref.)                        | 0.79 (0.70-0.90) | 0.59 (0.53-0.66) | 0.54 (0.48-0.60) | 0.47 (0.42-0.54) | <0.001  | 1 (ref.)                        | 0.75 (0.67-0.83) | 0.62 (0.56-0.69) | <0.001  |

|                                |          |                  |                  |                  |                  |        |          |                  |                  |        |
|--------------------------------|----------|------------------|------------------|------------------|------------------|--------|----------|------------------|------------------|--------|
| Model 2 <sup>e</sup>           | 1 (ref.) | 0.82 (0.73-0.92) | 0.63 (0.56-0.71) | 0.56 (0.51-0.61) | 0.51 (0.44-0.59) | <0.001 | 1 (ref.) | 0.79 (0.72-0.86) | 0.68 (0.63-0.73) | <0.001 |
| Model 3 <sup>f</sup>           | 1 (ref.) | 0.94 (0.86-1.04) | 0.81 (0.74-0.89) | 0.77 (0.71-0.85) | 0.76 (0.67-0.87) | <0.001 | 1 (ref.) | 0.87 (0.81-0.92) | 0.80 (0.74-0.87) | <0.001 |
| Model 4 <sup>g</sup>           | 1 (ref.) | 0.99 (0.90-1.09) | 0.88 (0.81-0.96) | 0.86 (0.78-0.94) | 0.86 (0.75-0.99) | <0.001 | 1 (ref.) | 0.90 (0.84-0.96) | 0.85 (0.79-0.92) | 0.001  |
| <b>Squamous cell carcinoma</b> |          |                  |                  |                  |                  |        |          |                  |                  |        |
| No. Lung cancer cases          | 972      | 814              | 589              | 478              | 374              |        | 1,879    | 740              | 449              |        |
| Model 1 <sup>d</sup>           | 1 (ref.) | 0.60 (0.54-0.68) | 0.43 (0.36-0.51) | 0.33 (0.28-0.38) | 0.27 (0.22-0.33) | <0.001 | 1 (ref.) | 0.63 (0.54-0.74) | 0.47 (0.40-0.54) | <0.001 |
| Model 2 <sup>e</sup>           | 1 (ref.) | 0.66 (0.60-0.73) | 0.49 (0.41-0.58) | 0.39 (0.33-0.47) | 0.35 (0.28-0.44) | <0.001 | 1 (ref.) | 0.71 (0.63-0.81) | 0.55 (0.49-0.63) | <0.001 |
| Model 3 <sup>f</sup>           | 1 (ref.) | 0.83 (0.75-0.92) | 0.70 (0.62-0.80) | 0.66 (0.58-0.75) | 0.62 (0.51-0.76) | <0.001 | 1 (ref.) | 0.81 (0.74-0.90) | 0.70 (0.62-0.78) | <0.001 |
| Model 4 <sup>g</sup>           | 1 (ref.) | 0.90 (0.81-0.99) | 0.79 (0.69-0.89) | 0.76 (0.67-0.86) | 0.74 (0.61-0.89) | <0.001 | 1 (ref.) | 0.84 (0.77-0.92) | 0.76 (0.67-0.86) | 0.007  |
| <b>Small cell carcinoma</b>    |          |                  |                  |                  |                  |        |          |                  |                  |        |
| No. Lung cancer cases          | 763      | 636              | 453              | 372              | 273              |        | 1,458    | 597              | 355              |        |
| Model 1 <sup>d</sup>           | 1 (ref.) | 0.60 (0.54-0.66) | 0.43 (0.35-0.53) | 0.36 (0.30-0.43) | 0.31 (0.22-0.43) | <0.001 | 1 (ref.) | 0.62 (0.48-0.81) | 0.46 (0.37-0.58) | <0.001 |
| Model 2 <sup>e</sup>           | 1 (ref.) | 0.67 (0.60-0.74) | 0.51 (0.41-0.63) | 0.44 (0.38-0.52) | 0.40 (0.28-0.56) | <0.001 | 1 (ref.) | 0.71 (0.55-0.91) | 0.56 (0.47-0.67) | <0.001 |
| Model 3 <sup>f</sup>           | 1 (ref.) | 0.89 (0.80-0.99) | 0.78 (0.66-0.92) | 0.78 (0.68-0.91) | 0.78 (0.56-1.07) | 0.01   | 1 (ref.) | 0.84 (0.69-1.03) | 0.74 (0.64-0.86) | <0.001 |
| Model 4 <sup>g</sup>           | 1 (ref.) | 0.95 (0.85-1.06) | 0.86 (0.73-1.02) | 0.89 (0.77-1.03) | 0.90 (0.66-1.24) | 0.21   | 1 (ref.) | 0.87 (0.71-1.05) | 0.79 (0.68-0.92) | 0.001  |

Participants from the Shanghai Men's and Women's Health Studies were included in the fiber-lung cancer analysis only. No data were available on yogurt consumption in these 2 cohorts.

- a. Estimated by random-effects meta-analysis
- b. Based on the quintiles of total dietary fiber intake among all study participants
- c. Defined as none (0 g/day), low ( $\leq$  sex-specific median intake), and high ( $>$ sex-specific median intake); participants from the SMHS/SWHS and those having invalid data on yogurt consumption were not included in the analysis
- d. Model 1, the minimally adjusted model: Stratified by birth year and enrollment year; and adjusted for age, total energy, sex, and race/ethnicity
- e. Model 2, adjusted for all covariates except smoking variables: Stratified by birth year and enrollment year; and adjusted for age, total energy, sex, race/ethnicity, education, obesity status, diabetes, family history of lung cancer, physical activity level, menopausal status in women, and intake of saturated and polyunsaturated fat
- f. Model 3 adjusted for all other covariates and smoking status: Stratified by birth year and enrollment year; and adjusted for age, total energy, smoking status, sex, race/ethnicity, education, obesity status, diabetes, family history of lung cancer, physical activity level, menopausal status in women, and intake of saturated and polyunsaturated fat
- g. Model 4, adjusted for all other covariates, smoking status, and smoking pack-years: Stratified by birth year and enrollment year; and adjusted for age, total energy, smoking status, smoking pack-years, sex, race/ethnicity, education, obesity status, diabetes, family history of lung cancer, physical activity level, menopausal status in women, and intake of saturated and polyunsaturated fat

**eTable 4. Hazard Ratios (95% CIs)<sup>a</sup> of Lung Cancer by Dietary Fiber Intake and Yogurt Consumption: Using the Common Cut-Points of Fiber and Yogurt Intakes Across Cohorts**

|                                | Total Fiber Intake <sup>b</sup> |                  |                  |                  |                  |         | Yogurt Consumption <sup>c</sup> |                  |                  |         |
|--------------------------------|---------------------------------|------------------|------------------|------------------|------------------|---------|---------------------------------|------------------|------------------|---------|
|                                | Q1                              | Q2               | Q3               | Q4               | Q5               | P trend | None                            | Low              | High             | P trend |
| <b>Total study populations</b> |                                 |                  |                  |                  |                  |         |                                 |                  |                  |         |
| No. Lung cancer cases          | 5,644                           | 4,505            | 3,381            | 2,871            | 2,421            |         | 9,897                           | 4,394            | 2,830            |         |
| HR (95% CI) <sup>d</sup>       | 1 (ref.)                        | 0.94 (0.89-1.00) | 0.86 (0.80-0.93) | 0.86 (0.80-0.92) | 0.82 (0.75-0.89) | <0.001  | 1 (ref.)                        | 0.86 (0.81-0.90) | 0.81 (0.76-0.87) | <0.001  |
| <b>Men</b>                     |                                 |                  |                  |                  |                  |         |                                 |                  |                  |         |
| No. Lung cancer cases          | 2,451                           | 2,152            | 1,826            | 1,633            | 1,639            |         | 5,621                           | 2,216            | 974              |         |
| HR (95% CI) <sup>d</sup>       | 1 (ref.)                        | 0.96 (0.87-1.05) | 0.93 (0.81-1.07) | 0.85 (0.75-0.96) | 0.82 (0.71-0.95) | <0.001  | 1 (ref.)                        | 0.82 (0.78-0.87) | 0.76 (0.70-0.82) | <0.001  |
| <b>Women</b>                   |                                 |                  |                  |                  |                  |         |                                 |                  |                  |         |
| No. Cases                      | 3,193                           | 2,353            | 1,555            | 1,238            | 782              |         | 4,276                           | 2,178            | 1,856            |         |
| HR (95% CI) <sup>d</sup>       | 1 (ref.)                        | 0.93 (0.85-1.02) | 0.83 (0.76-0.90) | 0.87 (0.80-0.96) | 0.82 (0.73-0.92) | <0.001  | 1 (ref.)                        | 0.90 (0.81-1.00) | 0.85 (0.78-0.94) | 0.004   |
| <b>Whites</b>                  |                                 |                  |                  |                  |                  |         |                                 |                  |                  |         |
| No. Lung cancer cases          | 4,161                           | 3,982            | 3,096            | 2,690            | 2,245            |         | 9,254                           | 4,032            | 2,738            |         |
| HR (95% CI) <sup>d</sup>       | 1 (ref.)                        | 0.92 (0.86-0.97) | 0.84 (0.77-0.91) | 0.86 (0.79-0.92) | 0.81 (0.74-0.90) | <0.001  | 1 (ref.)                        | 0.85 (0.81-0.90) | 0.82 (0.77-0.88) | <0.001  |
| <b>Blacks</b>                  |                                 |                  |                  |                  |                  |         |                                 |                  |                  |         |
| No. Lung cancer cases          | 187                             | 192              | 180              | 123              | 125              |         | 484                             | 261              | 57               |         |
| HR (95% CI) <sup>d</sup>       | 1 (ref.)                        | 1.03 (0.83-1.29) | 1.22 (0.97-1.53) | 0.95 (0.73-1.23) | 0.89 (0.67-1.18) | 0.31    | 1 (ref.)                        | 0.83 (0.70-0.98) | 0.78 (0.58-1.05) | 0.20    |
| <b>Asians</b>                  |                                 |                  |                  |                  |                  |         |                                 |                  |                  |         |
| No. Lung cancer cases          | 1,244                           | 288              | 71               | 33               | 20               |         | 60                              | 37               | 14               |         |
| HR (95% CI) <sup>d</sup>       | 1 (ref.)                        | 1.05 (0.91-1.20) | 0.96 (0.74-1.25) | 0.80 (0.47-1.36) | 0.83 (0.43-1.60) | 0.54    | 1 (ref.)                        | 0.90 (0.55-1.50) | 0.91 (0.45-1.84) | 0.91    |
| <b>Adenocarcinoma</b>          |                                 |                  |                  |                  |                  |         |                                 |                  |                  |         |
| No. Lung cancer cases          | 2,048                           | 1,684            | 1,272            | 1,081            | 919              |         | 3,446                           | 1,716            | 1,151            |         |
| HR (95% CI) <sup>d</sup>       | 1 (ref.)                        | 0.97 (0.88-1.06) | 0.87 (0.80-0.94) | 0.87 (0.79-0.96) | 0.84 (0.74-0.96) | <0.001  | 1 (ref.)                        | 0.90 (0.84-0.95) | 0.85 (0.79-0.92) | 0.001   |
| <b>Squamous cell carcinoma</b> |                                 |                  |                  |                  |                  |         |                                 |                  |                  |         |
| No. Lung cancer cases          | 936                             | 796              | 573              | 510              | 412              |         | 1,879                           | 786              | 403              |         |
| HR (95% CI) <sup>d</sup>       | 1 (ref.)                        | 0.90 (0.81-0.99) | 0.79 (0.70-0.89) | 0.81 (0.71-0.92) | 0.73 (0.61-0.86) | <0.001  | 1 (ref.)                        | 0.87 (0.78-0.98) | 0.72 (0.63-0.82) | <0.001  |
| <b>Small cell carcinoma</b>    |                                 |                  |                  |                  |                  |         |                                 |                  |                  |         |
| No. Lung cancer cases          | 754                             | 624              | 455              | 365              | 299              |         | 1,458                           | 593              | 359              |         |
| HR (95% CI) <sup>d</sup>       | 1 (ref.)                        | 0.93 (0.83-1.04) | 0.88 (0.73-1.05) | 0.87 (0.71-1.05) | 0.93 (0.70-1.23) | 0.31    | 1 (ref.)                        | 0.86 (0.71-1.05) | 0.80 (0.70-0.92) | 0.001   |

Participants from the Shanghai Men's and Women's Health Studies were included in the fiber-lung cancer analysis only. No data were available on yogurt consumption in these 2 cohorts.

a. Estimated by random-effects meta-analysis

b. Based on the quintiles of total dietary fiber intake among all study participants

- c. Defined as none (0 g/day), low ( $\leq$  the median intake among all study participants), and high ( $>$  the median intake among all study participants); participants from the SMHS/SWHS and those having invalid data on yogurt consumption were not included in the analysis
- d. Stratified by birth year and enrollment year; and adjusted for age, total energy, smoking status, smoking pack-years, sex, race/ethnicity, education, obesity status, diabetes, family history of lung cancer, physical activity level, menopausal status in women, and intake of saturated and polyunsaturated fat



**eTable 5. Hazard ratios (95% CIs)<sup>a</sup> of Lung Cancer by Dietary Fiber Intake and Yogurt Consumption: Using the Cohort- and Sex-Specific Cut-Points of Fiber and Yogurt Intakes**

|                                | Total Fiber Intake <sup>b</sup> |                  |                  |                  |                  |         | Yogurt Consumption <sup>c</sup> |                  |                  |         |
|--------------------------------|---------------------------------|------------------|------------------|------------------|------------------|---------|---------------------------------|------------------|------------------|---------|
|                                | Q1                              | Q2               | Q3               | Q4               | Q5               | P trend | None                            | Low              | High             | P trend |
| <b>Total study populations</b> |                                 |                  |                  |                  |                  |         |                                 |                  |                  |         |
| No. Lung cancer cases          | 5,571                           | 3,980            | 3,425            | 3,060            | 2,786            |         | 9,897                           | 3,920            | 3,304            |         |
| HR (95% CI) <sup>d</sup>       | 1 (ref.)                        | 0.93 (0.89-0.97) | 0.90 (0.85-0.96) | 0.87 (0.83-0.91) | 0.88 (0.81-0.96) | <0.001  | 1 (ref.)                        | 0.87 (0.82-0.92) | 0.81 (0.76-0.86) | <0.001  |
| <b>Men</b>                     |                                 |                  |                  |                  |                  |         |                                 |                  |                  |         |
| No. Lung cancer cases          | 2,848                           | 2,105            | 1,812            | 1,541            | 1,395            |         | 5,621                           | 1,812            | 1,378            |         |
| HR (95% CI) <sup>d</sup>       | 1 (ref.)                        | 0.94 (0.89-1.00) | 0.91 (0.82-1.02) | 0.84 (0.78-0.89) | 0.86 (0.75-0.98) | 0.001   | 1 (ref.)                        | 0.84 (0.80-0.89) | 0.76 (0.72-0.81) | 0.002   |
| <b>Women</b>                   |                                 |                  |                  |                  |                  |         |                                 |                  |                  |         |
| No. Lung cancer cases          | 2,723                           | 1,875            | 1,613            | 1,519            | 1,391            |         | 4,276                           | 2,108            | 1,926            |         |
| HR (95% CI) <sup>d</sup>       | 1 (ref.)                        | 0.91 (0.86-0.97) | 0.89 (0.83-0.96) | 0.91 (0.85-0.97) | 0.91 (0.81-1.02) | 0.04    | 1 (ref.)                        | 0.89 (0.80-0.99) | 0.86 (0.79-0.94) | 0.009   |
| <b>Whites</b>                  |                                 |                  |                  |                  |                  |         |                                 |                  |                  |         |
| No. Lung cancer cases          | 4,912                           | 3,444            | 2,931            | 2,603            | 2,284            |         | 9,254                           | 3,646            | 3,124            |         |
| HR (95% CI) <sup>d</sup>       | 1 (ref.)                        | 0.92 (0.87-0.97) | 0.90 (0.84-0.96) | 0.87 (0.82-0.91) | 0.85 (0.78-0.92) | <0.001  | 1 (ref.)                        | 0.86 (0.81-0.92) | 0.81 (0.77-0.87) | <0.001  |
| <b>Blacks</b>                  |                                 |                  |                  |                  |                  |         |                                 |                  |                  |         |
| No. Lung cancer cases          | 224                             | 161              | 156              | 139              | 127              |         | 484                             | 192              | 126              |         |
| HR (95% CI) <sup>d</sup>       | 1 (ref.)                        | 0.97 (0.79-1.21) | 1.05 (0.84-1.32) | 0.96 (0.76-1.21) | 0.97 (0.75-1.24) | 0.92    | 1 (ref.)                        | 0.81 (0.63-1.04) | 0.84 (0.68-1.04) | 0.61    |
| <b>Asians</b>                  |                                 |                  |                  |                  |                  |         |                                 |                  |                  |         |
| No. Lung cancer cases          | 378                             | 341              | 311              | 290              | 336              |         | 60                              | 33               | 18               |         |
| HR (95% CI) <sup>d</sup>       | 1 (ref.)                        | 1.01 (0.87-1.17) | 0.96 (0.82-1.12) | 0.88 (0.71-1.09) | 1.04 (0.84-1.28) | 0.96    | 1 (ref.)                        | 1.16 (0.70-1.92) | 0.62 (0.32-1.19) | 0.37    |
| <b>Adenocarcinoma</b>          |                                 |                  |                  |                  |                  |         |                                 |                  |                  |         |
| No. Lung cancer cases          | 1,912                           | 1,465            | 1,293            | 1,220            | 1,114            |         | 3,446                           | 1,527            | 1,340            |         |
| HR (95% CI) <sup>d</sup>       | 1 (ref.)                        | 0.93 (0.87-1.00) | 0.89 (0.82-0.95) | 0.88 (0.81-0.95) | 0.86 (0.76-0.96) | 0.001   | 1 (ref.)                        | 0.90 (0.85-0.96) | 0.85 (0.79-0.91) | 0.004   |
| <b>Squamous cell carcinoma</b> |                                 |                  |                  |                  |                  |         |                                 |                  |                  |         |
| No. Lung cancer cases          | 1,072                           | 687              | 554              | 514              | 400              |         | 1,879                           | 671              | 518              |         |
| HR (95% CI) <sup>d</sup>       | 1 (ref.)                        | 0.88 (0.79-0.97) | 0.81 (0.73-0.90) | 0.86 (0.76-0.96) | 0.77 (0.67-0.89) | <0.001  | 1 (ref.)                        | 0.84 (0.76-0.93) | 0.78 (0.68-0.89) | 0.007   |
| <b>Small cell carcinoma</b>    |                                 |                  |                  |                  |                  |         |                                 |                  |                  |         |
| No. Lung cancer cases          | 833                             | 543              | 446              | 357              | 318              |         | 1,458                           | 521              | 431              |         |
| HR (95% CI) <sup>d</sup>       | 1 (ref.)                        | 0.94 (0.84-1.05) | 0.93 (0.83-1.05) | 0.86 (0.76-0.99) | 0.94 (0.75-1.16) | 0.47    | 1 (ref.)                        | 0.84 (0.70-1.01) | 0.82 (0.72-0.92) | 0.05    |

Participants from the Shanghai Men's and Women's Health Studies were included in the fiber-lung cancer analysis only. No data were available on yogurt consumption in these 2 cohorts.

a. Estimated by random-effects meta-analysis

b. Based on the cohort- and sex-specific quintiles of total dietary fiber intake

- c. Defined as none (0 g/day), low ( $\leq$  cohort- and sex-specific median intake of yogurt), and high ( $>$  cohort- and sex-specific median intake of yogurt); participants from the SMHS/SWHS and those having invalid data on yogurt consumption were not included in the analysis
- d. Stratified by birth year and enrollment year; and adjusted for age, total energy, smoking status, smoking pack-years, sex, race/ethnicity, education, obesity status, diabetes, family history of lung cancer, physical activity level, menopausal status in women, and intake of saturated and polyunsaturated fat

**eTable 6. Hazard ratios (95% CIs) of Lung Cancer by Dietary Fiber Intake and Yogurt Consumption: Sensitivity Analyses Among the Total Study Population**

|                                                                           | Total Fiber Intake <sup>a</sup> |                  |                  |                  |                  |         | Yogurt Consumption <sup>b</sup> |                  |                  |         |
|---------------------------------------------------------------------------|---------------------------------|------------------|------------------|------------------|------------------|---------|---------------------------------|------------------|------------------|---------|
|                                                                           | Q1                              | Q2               | Q3               | Q4               | Q5               | P trend | None                            | Low              | High             | P trend |
| <b>Fixed-effects meta-analysis</b>                                        |                                 |                  |                  |                  |                  |         |                                 |                  |                  |         |
| No. Lung cancer cases                                                     | 5,686                           | 4,603            | 3,440            | 2,809            | 2,284            |         | 9,897                           | 4,326            | 2,898            |         |
| HR (95% CI) <sup>c</sup>                                                  | 1 (ref.)                        | 0.95 (0.91-0.99) | 0.87 (0.83-0.91) | 0.85 (0.80-0.90) | 0.82 (0.77-0.88) | <0.001  | 1 (ref.)                        | 0.85 (0.81-0.88) | 0.82 (0.78-0.86) | <0.001  |
| <b>One stage individual participant data pooled analysis <sup>d</sup></b> |                                 |                  |                  |                  |                  |         |                                 |                  |                  |         |
| No. Lung cancer cases                                                     | 5,686                           | 4,603            | 3,440            | 2,809            | 2,284            |         | 9,897                           | 4,326            | 2,898            |         |
| HR (95% CI) <sup>c</sup>                                                  | 1 (ref.)                        | 0.94 (0.90-0.98) | 0.87 (0.83-0.91) | 0.84 (0.80-0.89) | 0.81 (0.76-0.85) | <0.001  | 1 (ref.)                        | 0.84 (0.81-0.88) | 0.81 (0.77-0.85) | <0.001  |
| <b>Density method for total energy adjustment <sup>e</sup></b>            |                                 |                  |                  |                  |                  |         |                                 |                  |                  |         |
| No. Lung cancer cases                                                     | 5,403                           | 4,165            | 3,500            | 3,021            | 2,733            |         | 9,897                           | 4,333            | 2,891            |         |
| HR (95% CI) <sup>c</sup>                                                  | 1 (ref.)                        | 0.93 (0.88-0.98) | 0.91 (0.86-0.97) | 0.86 (0.81-0.92) | 0.84 (0.76-0.94) | <0.001  | 1 (ref.)                        | 0.86 (0.82-0.90) | 0.82 (0.76-0.88) | <0.001  |
| <b>Alternative adjustment <sup>f</sup>: Residual method</b>               |                                 |                  |                  |                  |                  |         |                                 |                  |                  |         |
| No. Lung cancer cases                                                     | 5,686                           | 4,603            | 3,440            | 2,809            | 2,284            |         | 9,897                           | 4,326            | 2,898            |         |
| HR (95% CI) <sup>g</sup>                                                  | 1 (ref.)                        | 0.94 (0.89-1.00) | 0.86 (0.80-0.93) | 0.82 (0.78-0.87) | 0.80 (0.74-0.85) | <0.001  | 1 (ref.)                        | 0.86 (0.81-0.90) | 0.83 (0.78-0.89) | <0.001  |

Participants from the Shanghai Men's and Women's Health Studies were included in the fiber-lung cancer analysis only. No data were available on yogurt consumption in these 2 cohorts.

- a. Based on the sex-specific quintiles of total dietary fiber intake
- b. Defined as none (0 g/day), low ( $\leq$  sex-specific median intake), and high ( $>$ sex-specific median intake)
- c. Stratified by birth year and enrollment year; and adjusted for age, total energy, smoking status, smoking pack-years, gender, race/ethnicity, education, obesity status, diabetes, family history of lung cancer, physical activity level, menopausal status in women, and intake of saturated and polyunsaturated fat
- d. Analyzed all individual participant data from all participating cohort studies in a single step with a stratification by cohorts, assuming fixed effects
- e. Per 2,500kcal/day for men and 2,000 kcal/day for women; Random-effects meta-analysis based on the sex-specific quintiles
- f. Adjustment for red meat and total vegetable consumption instead of saturated and polyunsaturated fat intake
- g. Stratified by birth year and enrollment year; and adjusted for age, total energy, smoking status, smoking pack-years, gender, race/ethnicity, education, obesity status, diabetes, family history of lung cancer, physical activity level, menopausal status in women, and red meat and total vegetable consumption

**eFigure 1. Lung Cancer Risk Associated With Dietary Fiber Intake in Each Participating Cohort**

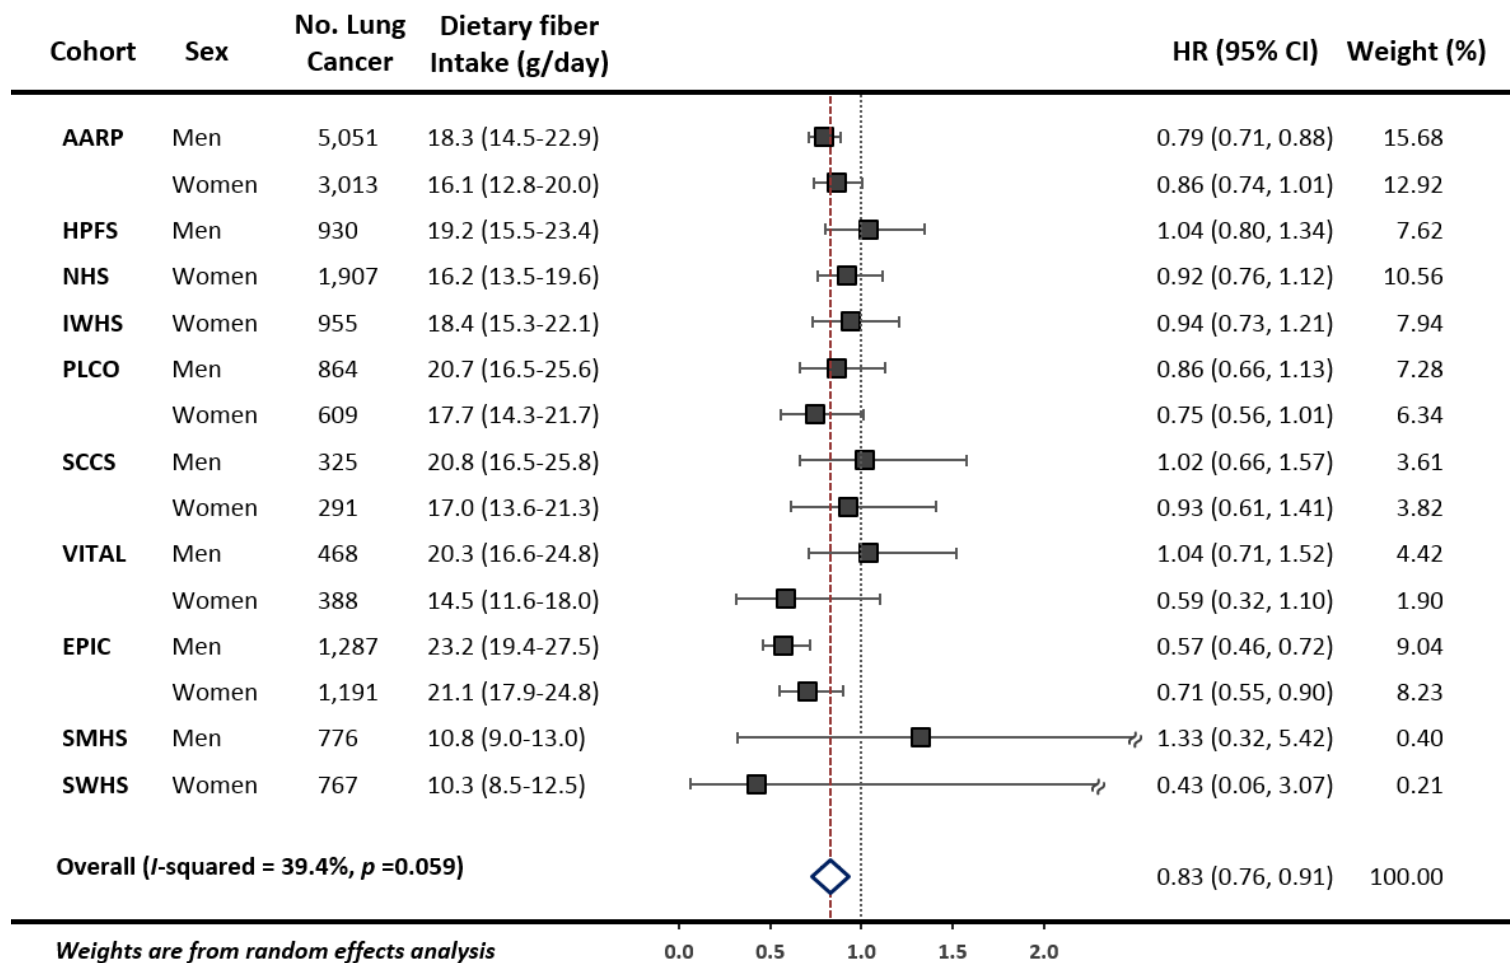

Abbreviations: AARP, National Health Institute-AARP Diet and Health Study; HPFS, Health Professionals Follow-up Study; NHS, Nurses' Health Study; IWHS, Iowa Women's Health Study; PLCO, Prostate, Lung, Colorectal and Ovarian Cancer Screening Trial; SCCS, Southern Community Cohort Study; VITAL, VITamins And Lifestyle Study; EPIC, European Prospective Investigation into Cancer & Nutrition; SMHS, Shanghai Men's Health Study; SWHS, Shanghai Women's Health Study.

Hazard ratios (HRs) and 95% CIs for the highest vs. lowest sex-specific quintiles of total dietary fiber intake were stratified by birth year and enrollment year; and adjusted for age, total energy, smoking status, smoking pack-years, sex, race/ethnicity, education, obesity status, diabetes, family history of lung cancer, physical activity level, menopausal status in women, and intake of saturated and polyunsaturated fat.

**eFigure 2. Lung Cancer Risk Associated With Yogurt Consumption in Each Participating Cohort**

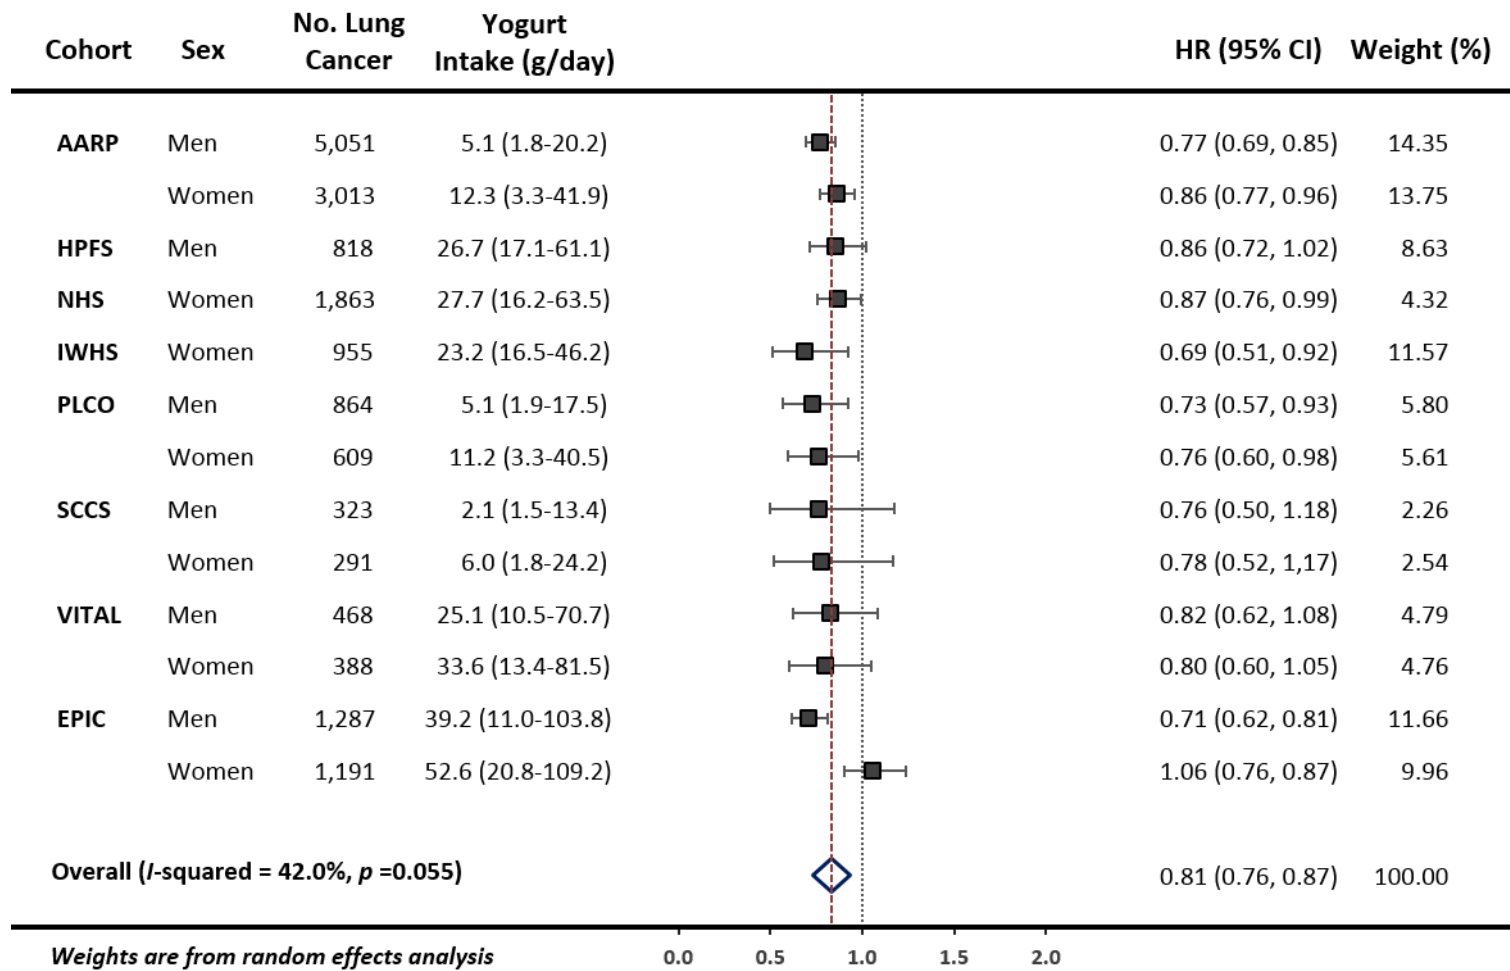

Abbreviations: AARP, National Health Institute-AARP Diet and Health Study; HPFS, Health Professionals Follow-up Study; NHS, Nurses' Health Study; IWHS, Iowa Women's Health Study; PLCO, Prostate, Lung, Colorectal and Ovarian Cancer Screening Trial; SCCS, Southern Community Cohort Study; VITAL, VITamins And Lifestyle Study; EPIC, European Prospective Investigation into Cancer & Nutrition. Participants from the Shanghai Men's/Women's Health Studies and those having invalid data on yogurt consumption were not included in the analysis. Yogurt consumption was defined as none (0 g/day), low ( $\leq$  sex-specific median intake), and high ( $>$ sex-specific median intake). Hazard ratios (HRs) and 95% CIs for high vs. none were stratified by birth year and enrollment year; and adjusted for age, total energy, smoking status, smoking pack-years, sex, race/ethnicity, education, obesity status, diabetes, family history of lung cancer, physical activity level, menopausal status in women, and intake of saturated and polyunsaturated fat.

**eFigure 3. Dose-Response Relationship of Dietary Fiber Intake and Yogurt Consumption With Lung Cancer Risk**

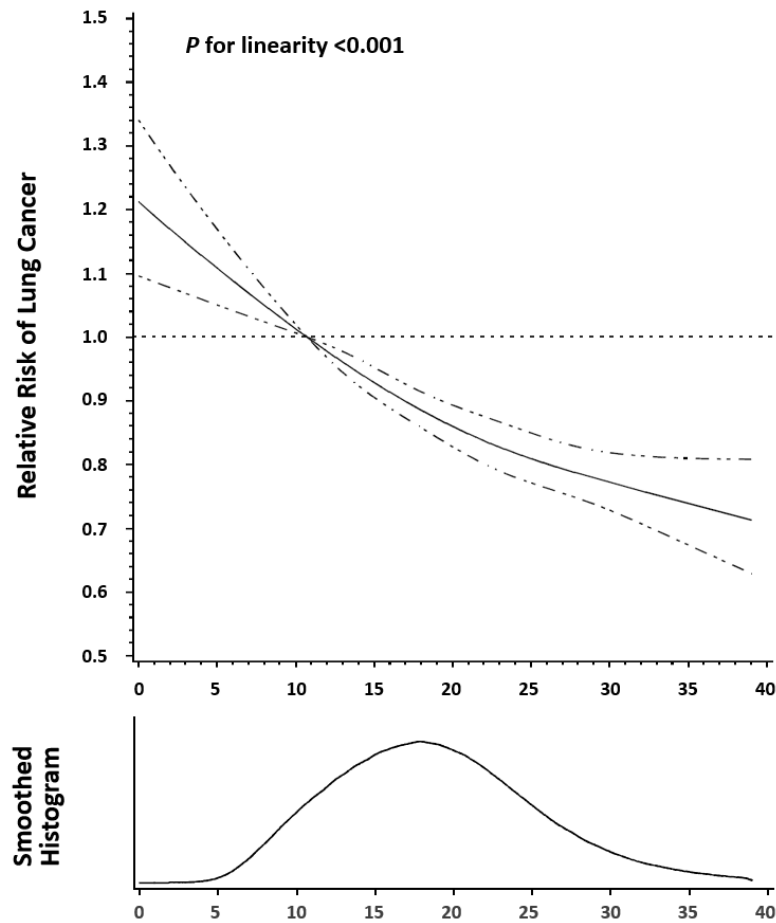

**A. Dietary Fiber Intake (grams/day)**

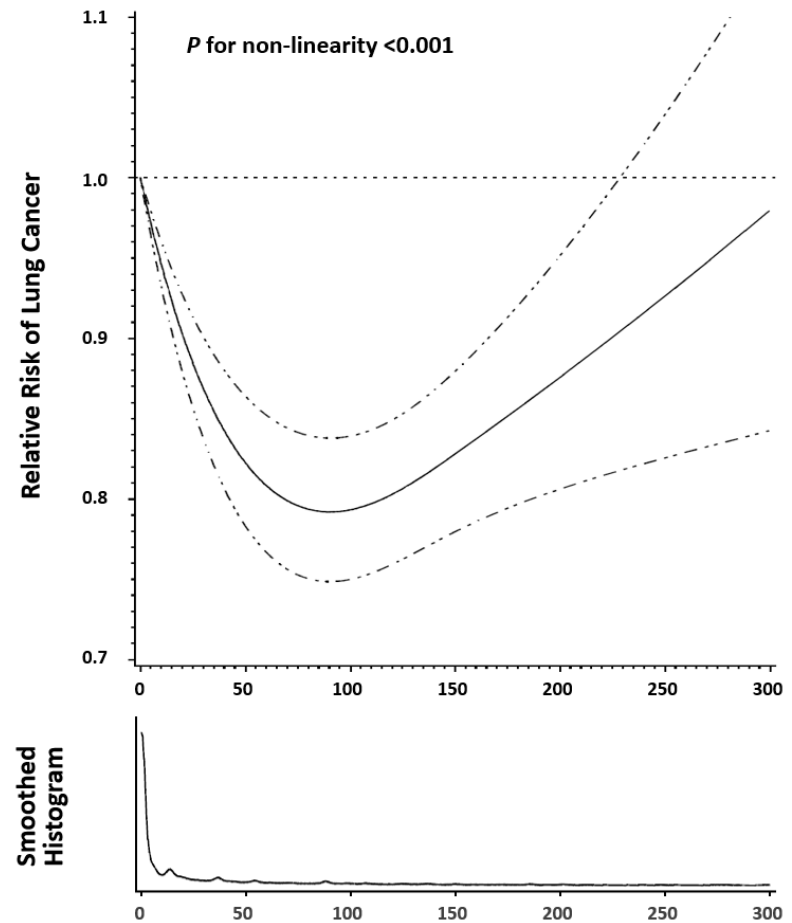

**B. Yogurt Consumption (grams/day)**

Hazard ratios (solid line) and 95% CIs (dashed line) were estimated in a single dataset pooling all individual-participant data. Participants from the Shanghai Men's and Women's Health Studies were included in the fiber-lung cancer analysis only. No data were available on yogurt consumption in these 2 cohorts. To minimize potential effects of extreme values, participants with the top 1% of each fiber/yogurt intake were excluded from the analysis. The 10th percentile was set as reference. Based upon the Akaike's Information Criterion, four knots were fitted at the 5th, 25th, 75th, and 95th percentiles of fiber intake and three knots were fitted at the 5th, 50th, and 95th percentiles of yogurt consumption. All models were stratified by birth year and enrollment year; and adjusted for age, total energy, smoking status, smoking pack-years, sex, race/ethnicity, education, obesity status, diabetes, family history of lung cancer, physical activity level, menopausal status in women, and intake of saturated and polyunsaturated fat.
